# Supplementary material
Source: publisher site journal article supplement (https://www.dovepress.com/article/337031)
Supplement: Supplementary file 1 [file get_supplementary_file.php]

**Table S1. Characteristics of healthy (n = 22) and psoriasis patients (n = 16) included in this study**

|  | **Healthy** | **Psoriasis** |
| --- | --- | --- |
| **Male/female** | 12/10 | 10/6 |
| **Age** | 42.1±12.1 | 49±12.7 |
| **Type** | - | Psoriasis Vulgaris (16) |
| **Early-onset psoriasis (< 40 year)** | - | 11/16 |
| **Duration of the disease** | - | 13.1±10.4 |

Mean ± standard deviation

**Table S2. List of gene expression primer**

| **Primer** | **Forward (5’- 3’)** | **Reverse (5’- 3’)** |
| --- | --- | --- |
| IL1b | CAACCAACAAGTGATATTCTCCATG | GATCCACACTCTCCAGCTGCA |
| IL17 | CTCCAGAAGGCCCTCAGACTAC | GGGTCTTCATTGCGGTGG |
| IL23 | ATGCTGGATTGCAGAGCAGTA | ACGGGGCACATTATTTTTAGTCT |
| IL10 | CACTAAGTTCCATAAACCGGAAA | TGTGTAAAAGCCCCAGAACC |
| IL6 | TGAGATCTACTCGGCAAACCTAGTG | CTTCGTAGAGAACAACATAAGTCAGATACC |
| CXCL2 | CGCCCAGACAGAAGTCATAGC | CTTTGGTTCTTCCGTTGAGGG |
| CXCL1 | CCTATCGCCAATGAGCTGC | CTCGCGACCATTCTTGAGTG |
| S100A8 | GTTGTCTCCATAGCCCGAGG | TCCAGTTCAGACGGCATTGTC |
| S100A9 | ACTGGGCTTACACTGCTCTT | AGGTGTCGATGATGGTGGTT |
| CCL2 | TTAAAAACCTGGATCGGAACCAA | GCATTAGCTTCAGATTTACGGGT |
| CCL20 | CGTCTGCTCTTCCTTGCTTT | ACAGTCGTAGTTGCTTGCTG |
| Actin | TGGAATCCTGTGGCATCCATGAAAC | TAAAACGCAGCTCAGTAACAGTCCG |

**Table S3. Baseline characteristics of FMT donors included in this study.**

|  | **Healthy** | | | | | **Psoriasis** | | | | |
| --- | --- | --- | --- | --- | --- | --- | --- | --- | --- | --- |
|  | **H1** | **H2** | **H3** | **H4** | **H5** | **PS1** | **PS2** | **PS3** | **PS4** | **PS5** |
| **Age-yr** | 28 | 32 | 31 | 34 | 31 | 51 | 42 | 50 | 49 | 40 |
| **Gender** | Female | Male | Male | Female | Female | Male | Female | Female | Male | Male |
| **BMI** | 21.5 | 20.7 | 19.6 | 21.2 | 20.6 | 22.0 | 25.7 | 22.1 | 20.6 | 21.9 |
| **Early-onset psoriasis** | - | - | - | - | - | 21 | 32 | 29 | 19 | 32 |
| **Duration of the disease** | - | - | - | - | - | 30 | 10 | 21 | 30 | 8 |
